# Supplementary material for: Conformational Dynamics of Herpesviral NEC Proteins in Different Oligomerization States
Source: MDPI journal article supplement (doi:10.3390/ijms19102908), 2018-09-25
Supplement: s1 [file s1]

# Conformational Dynamics of Herpesviral NEC Proteins in Different Oligomerization States

Benedikt Diewald<sup>1</sup>, Eileen Socher<sup>1</sup>, Christian A. Söldner<sup>1</sup> and Heinrich Sticht<sup>1,\*</sup>

<sup>1</sup> Division of Bioinformatics, Institute of Biochemistry, Friedrich-Alexander-University Erlangen-Nürnberg (FAU), Fahrstraße 17, 91054 Erlangen, Germany, [benedikt.diewald@fau.de](mailto:benedikt.diewald@fau.de), [eileen.socher@fau.de](mailto:eileen.socher@fau.de), [christian.soeldner@fau.de](mailto:christian.soeldner@fau.de)

\* Correspondence: [heinrich.sticht@fau.de](mailto:heinrich.sticht@fau.de)

Received: date; Accepted: date; Published: date

**Keywords:** molecular dynamics, HCMV, HSV-1, PRV, nuclear egress complex, alpha-herpesvirus, beta-herpesvirus

---

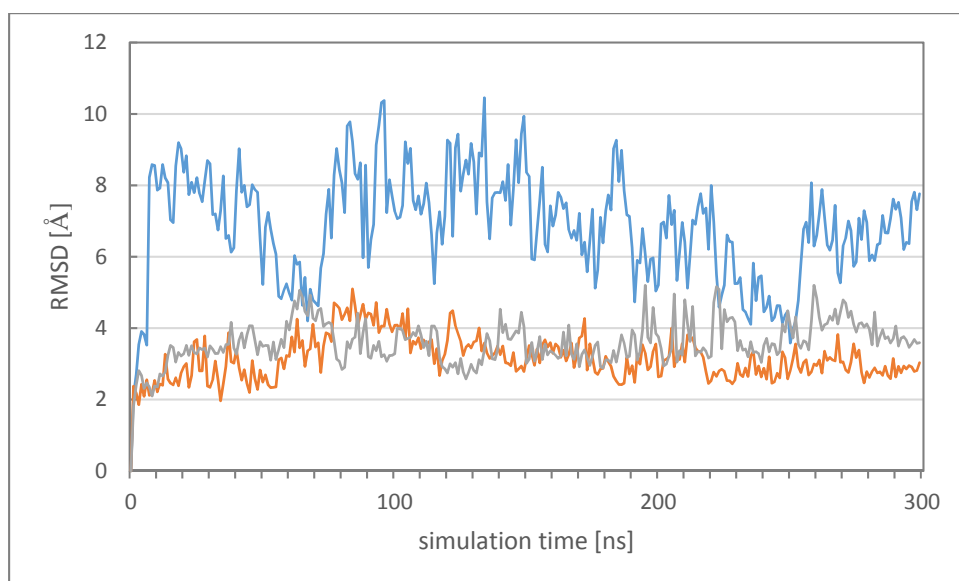

**Figure S1.** Plot of the RMSD of the HCMV NEC (blue), the HSV-1 NEC (orange), and the PRV NEC (grey), of run2 of the heterodimer simulations.

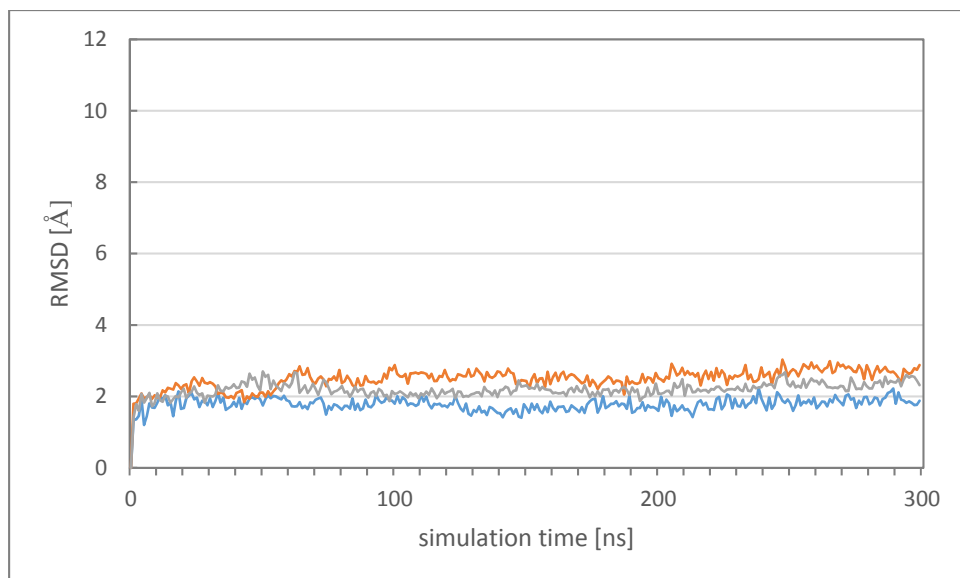

**Figure S2.** Plot of the RMSD of the pUL53 (pUL31) subdomains of HCMV (blue), HSV-1 (orange), and PRV (grey), of run2 of the heterodimer simulations.

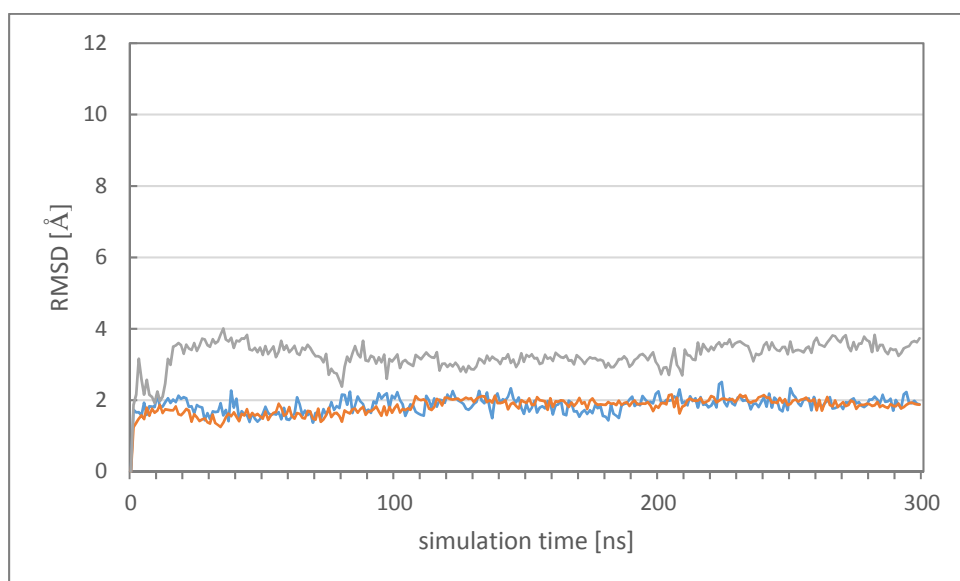

**Figure S3.** Plot of the RMSD of the pUL50 (pUL34) subdomains of HCMV (blue), HSV-1 (orange), and PRV (grey), of run2 of the heterodimer simulations.

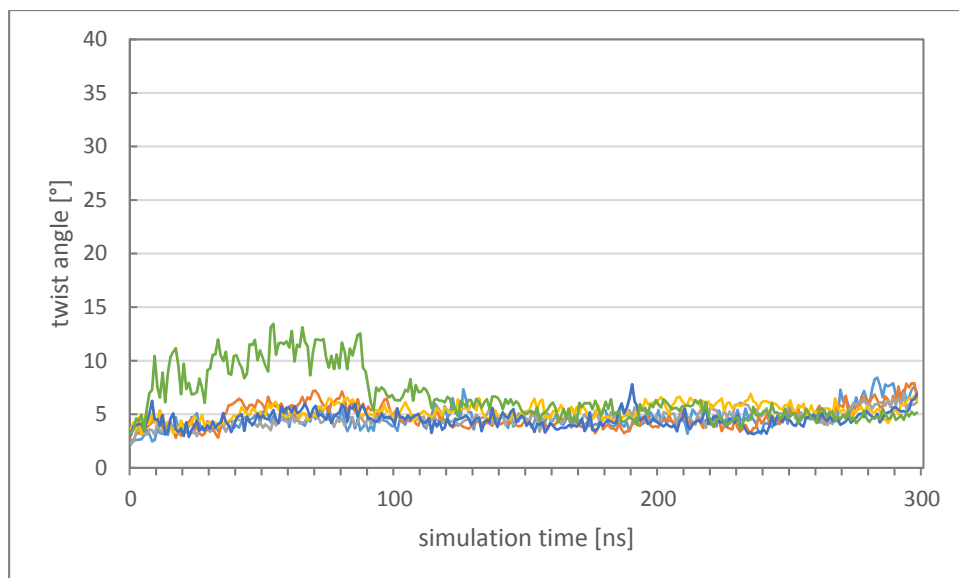

**Figure S4.** Twist angle of HCMV Hexagon simulation run2; the different colours mark the individual heterodimers.

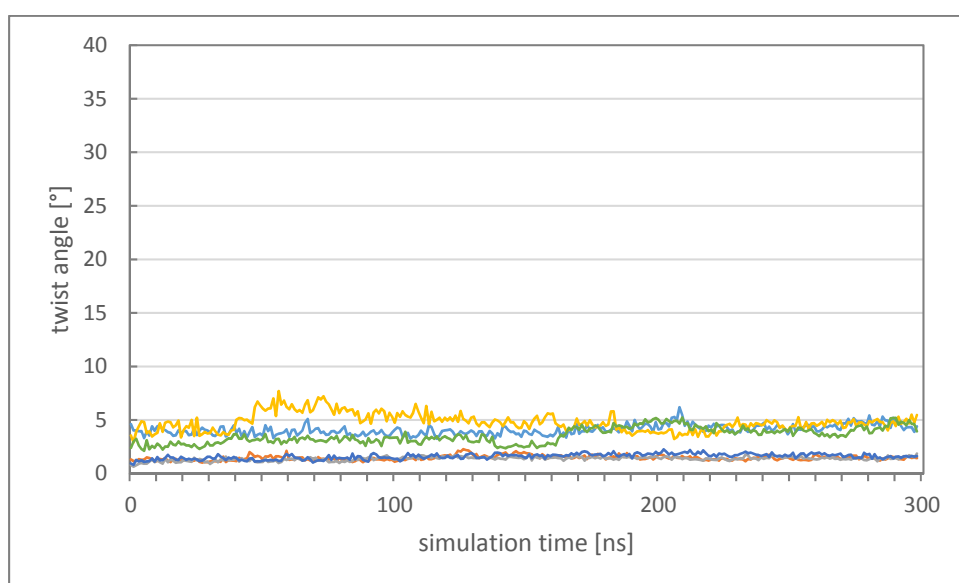

**Figure S5.** Twist angle of HSV-1 Hexagon simulation run2; the different colours mark the individual heterodimers.

**Movie M1.** The twisting of the HCMV NEC subdomains illustrated by a video containing simulation frames arranged in a fashion that displays a continuous twist. In the video the twisting is played forwards and backwards, so it can be watched in a loop.

**Movie M2.** This video shows the first 120 ns of run1 of the HCMV Hexagon simulation. All chains are coloured individually. Top-view on the pUL53 side with the pUL50 subdomains partially concealed.

**Movie M3.** This video shows the first 120 ns of run1 of the HSV-1 Hexagon simulation. All chains are coloured individually. Top-view on the pUL31 side with the pUL34 subdomains partially concealed.
